# Supplementary material
Source: PubMed Central journal article supplement (PMC4146492)
Supplement: NIHMS615858-supplement-Graphical_Abstract.pdf [file NIHMS615858-supplement-Graphical_Abstract.pdf]

TOC graph and text

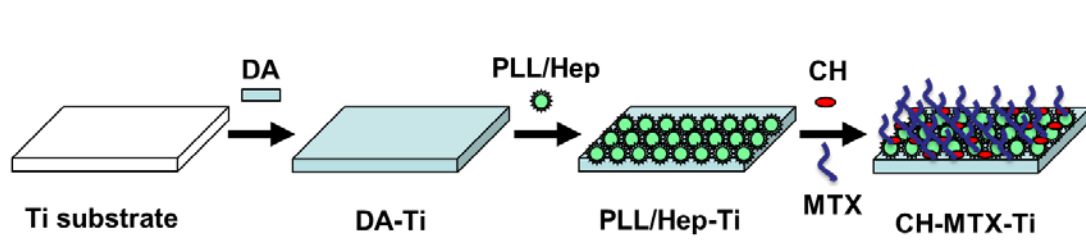

Titanium bone implants are modified with nanoparticle-stabilized chitosan and methotrexate to become capable of inhibiting osteoclastoma formation and bacterial infection
