# Supplementary material
Source: PubMed Central journal article supplement (PMC4146492)
Supplement: NIHMS615858-supplement-Supplementary_Information.pdf [file NIHMS615858-supplement-Supplementary_Information.pdf]

Supporting information:

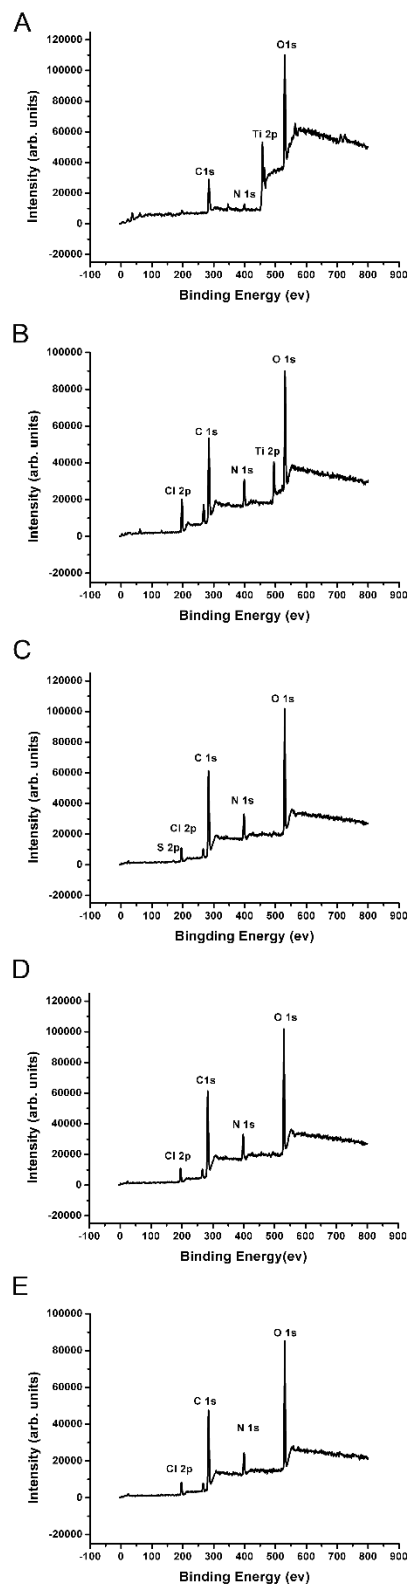

**Figure S1. XPS spectra of pristine Ti and functionalized Ti substrates:** (a) Pristine Ti; (b) DA-Ti; (c) PLL/Hep-Ti; (d) CH-Ti; (e) CH-MTX-Ti; The appearance of Cl2p peaks in the spectra was due to the remnant salt and Tris-HCl from the functionalization reaction systems.

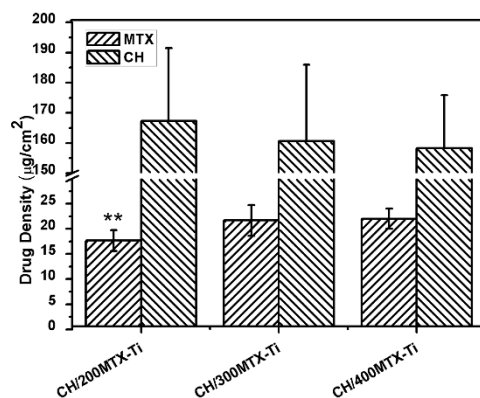

**Figure S2. Quantitative measurements of the amount of MTX and CH loaded on unit area of different CH-MTX Ti surfaces.** The functionalized Ti substrate were immersed into 1 ml of CH (1.5 mg/ml) and MTX (200, 300, 400 µg/ml) solution. The resultant substrates are termed CH/200MTX-Ti, CH/300MTX-Ti and CH/400MTX-Ti. The drug loading density of CH/MTX-Ti on the substrates was calculated by the change of concentration of the CH/MTX solution. \*\* denotes a significant difference when compared to the 400 µg/ml group ( $p < 0.01$ ) as determined by one way ANOVA. Results are represented by mean  $\pm$  SD of 3 independent experiments.

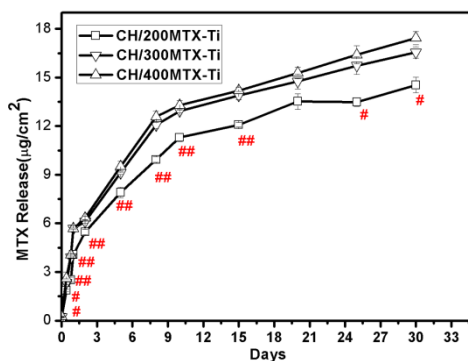

**Figure S3. In vitro release of MTX from CH/200MTX-Ti, CH/300MTX-Ti and CH/400MTX-Ti at 37°C.** The data represent mean  $\pm$  S.D. ( $n=3$ ). Symbol denotes a significant difference when compared to substrates modified with CH/MTX400-Ti group at the same time point as determined by one way ANOVA. #,  $p < 0.05$ ; ##,  $p < 0.01$ .

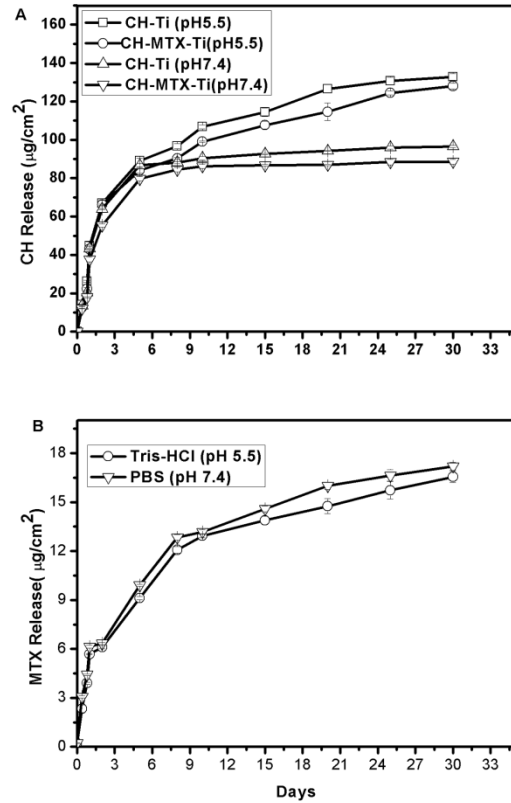

**Figure S4.** In vitro release of CH from CH-Ti and CH-MTX-Ti substrates in buffer at pH 5.5 and 7.4 (A) and in vitro release of MTX from CH-MTX-Ti substrates in buffer at pH 5.5 and 7.4 (B) at 37°C. The data represent means $\pm$ S.D. (n=3).

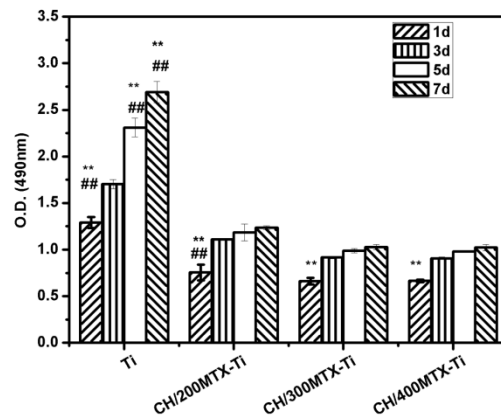

**Figure S5.** MTT reduction activity of GCTs cultured on differently functionalized Ti substrates for 1, 3 and 7 days. Symbol denotes significant differences as determined by one way ANOVA. One symbol,  $p < 0.05$ ; 2 symbols,  $p < 0.01$ . #, compared to substrates modified with CH/MTX400-Ti group on the same day. \*, compared to the same substrates on Day 3. Results are represented by mean  $\pm$  SD of 3 independent experiments.
